# Supplementary material for: Effect of electrolyte optimization on nitrogen-doped MXene (Ti3C2Tx) coupled with Cu–BTC MOF for a supercapattery and the hydrogen evolution reaction
Source: Royal Society of Chemistry journal article supplement (doi:10.1039/d3nj05510h), 2024-01-01
Supplement: d3nj05510h1.pdf [file d3nj05510h1.pdf]

## Effect of Electrolyte Optimization on Nitrogen-Doped MXene ( $\text{Ti}_3\text{C}_2\text{T}_x$ ) Coupled with Cu-BTC MOF for Supercapattery and Hydrogen Evolution Reaction

Haseebul Hassan<sup>1</sup>, Ehtisham Umar<sup>2</sup>, M. Waqas Iqbal<sup>1\*</sup>, Afaf Khadr Alqorashi<sup>3</sup>, Badriah S. Almutair<sup>4</sup>, HusseiAlrobei<sup>5</sup>, Amir Muhammad Afzal<sup>1</sup>, Niaz Ahmed<sup>1</sup>

<sup>1</sup>*Department of Physics, Riphah International University, Campus Lahore, Pakistan*

<sup>2</sup>*Department of Physics, Government College University Lahore, 54000, Punjab, Pakistan*

<sup>3</sup>*Department of Physics, College of Science, Taif University, P.O. Box 11099, Taif*

<sup>4</sup>*Department of physics, College of Science, Princess Nourah bint Abdulrahman University, P.O. Box 84428, Riyadh 11671, Saudi Arabia.*

<sup>5</sup>*Department of Mechanical Engineering, College of Engineering, Prince Sattam bin Abdul Aziz University, Al- Kharj, 11942, Saudi Arabia*

E-mail: [waqas.iqbal@riphah.edu.pk](mailto:waqas.iqbal@riphah.edu.pk),

### Supplementary Section:

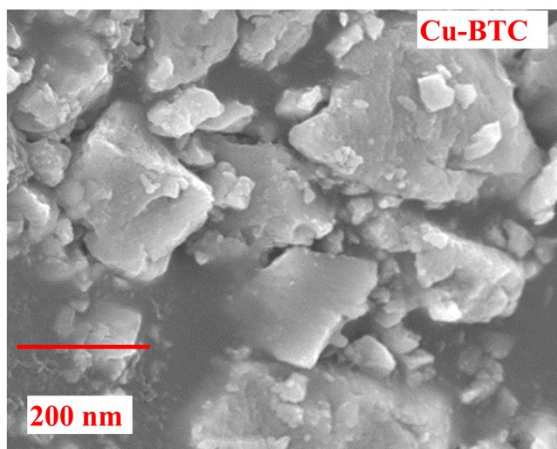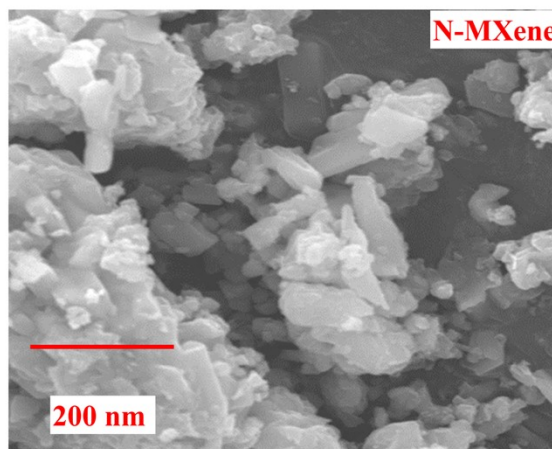

**Figure S1.** (a-b) SEM images for Cu-BTC and N-MXene.

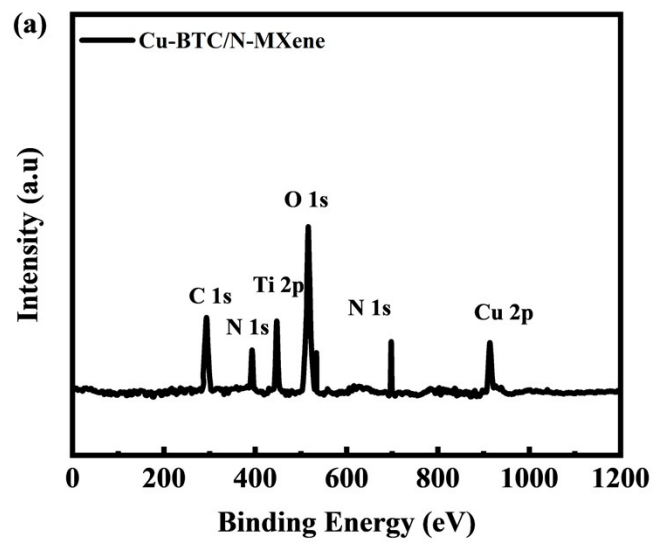

**Figure S2.** Survey XPS spectrum for Cu-BTC/N-MXene.
